# Supplementary material for: Western and Clark's grebes use novel strategies for running on water
Source: Oxford University Press journal article supplement (doi:10.1242/jeb.118745), 2015-04-15
Supplement: jeb118745supp.pdf [file jeb118745supp.pdf]

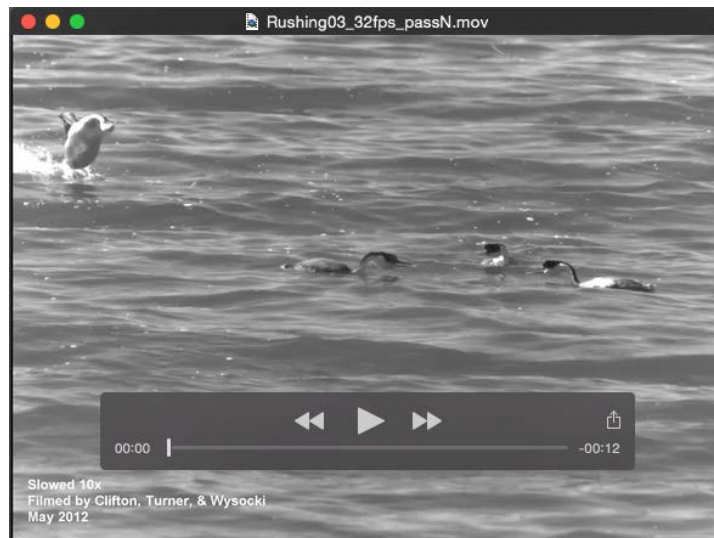

**Movie 1. High-speed footage of Western grebes rushing.** Footage was recorded at 325 fps and is played back at 32 fps. The file has been reduced to 50% of its original resolution and compressed, reducing video quality. The clip likely shows an aggressive behavior by a male against a group of males preparing to rush near his pair-bonded female.

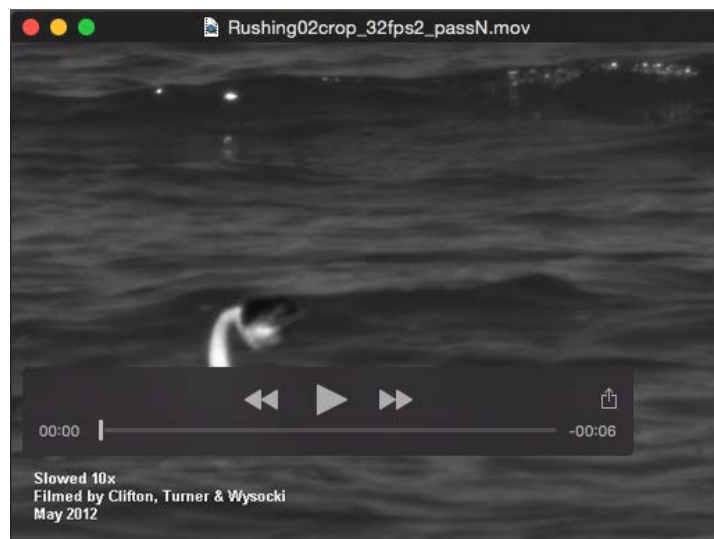

**Movie 2. Close-up high-speed footage of a Western grebe rushing.** Footage was recorded at 325 fps and is played back at 32 fps. The file has been cropped around the rushing grebe to highlight its hindlimb movements.
